# Supplementary material for: Functional plasticity of the gut and the Malpighian tubules underlies cold acclimation and mitigates cold-induced hyperkalemia in Drosophila melanogaster
Source: Oxford University Press journal article supplement (doi:10.1242/jeb.174904), 2018-01-01
Supplement: jeb174904supp.pdf [file jeb174904supp.pdf]

**Table S1. Results of two-way ANOVAs assessing the effects of acclimation and exposure temperatures on Malpighian tubule function. Ramsay assays and ion-selective microelectrodes were used to measure fluid secretion rate, [Na<sup>+</sup>] in secreted fluid, [K<sup>+</sup>] in secreted fluid, Na<sup>+</sup> secretion rate, K<sup>+</sup> secretion rate, and the ratio of Na<sup>+</sup>:K<sup>+</sup> in the secreted fluid. DF = degrees of freedom.**

| <b>Trait</b>                                            | <b>Variable</b>                                | <b>Statistic (DF)</b> | <b>P-value</b> |
|---------------------------------------------------------|------------------------------------------------|-----------------------|----------------|
| Secretion Rate                                          | Acclimation temperature x Exposure temperature | F (3, 70) = 6.6       | P = 0.0006     |
|                                                         | Exposure temperature                           | F (3, 70) = 91.6      | P < 0.0001     |
|                                                         | Acclimation temperature                        | F (1, 70) = 21.5      | P < 0.0001     |
| [Na <sup>+</sup> ] in Secreted Fluid                    | Acclimation temperature x Exposure temperature | F (3, 66) = 5.7       | P = 0.0016     |
|                                                         | Exposure temperature                           | F (3, 66) = 22.5      | P < 0.0001     |
|                                                         | Acclimation temperature                        | F (1, 66) = 54.2      | P < 0.0001     |
| [K <sup>+</sup> ] in Secreted Fluid                     | Acclimation temperature x Exposure temperature | F (3, 67) = 3.7       | P = 0.0157     |
|                                                         | Exposure temperature                           | F (3, 67) = 7.6       | P = 0.0002     |
|                                                         | Acclimation temperature                        | F (1, 67) = 17.3      | P < 0.0001     |
| Na <sup>+</sup> Secretion Rate                          | Acclimation temperature x Exposure temperature | F (3, 68) = 4.5       | P = 0.0065     |
|                                                         | Exposure temperature                           | F (3, 68) = 117.1     | P < 0.0001     |
|                                                         | Acclimation temperature                        | F (1, 68) = 5.1       | P = 0.0265     |
| K <sup>+</sup> Secretion Rate                           | Acclimation temperature x Exposure temperature | F (3, 69) = 3.3       | P = 0.0239     |
|                                                         | Exposure temperature                           | F (3, 69) = 57.0      | P < 0.0001     |
|                                                         | Acclimation temperature                        | F (1, 69) = 12.1      | P = 0.0009     |
| Na <sup>+</sup> :K <sup>+</sup> Ratio in Secreted Fluid | Acclimation temperature x Exposure temperature | F (3, 66) = 6.8       | P = 0.0005     |
|                                                         | Exposure temperature                           | F (3, 66) = 7.7       | P = 0.0002     |
|                                                         | Acclimation temperature                        | F (1, 66) = 28.3      | P < 0.0001     |
